# Supplementary material for: The VAPB Axis Precisely Coordinates the Timing of Motoneuron Dendritogenesis in Neural Map Development
Source: Research Square preprint supplement (doi:10.21203/rs.3.rs-5684747/v1), 2024-12-31
Supplement: Supplementary file 1 [file b7c082649ad49963dd2dd816.docx]

**Supplementary information**

***The VAPB Axis Precisely Coordinates the Timing of Motoneuron Dendritogenesis in Neural Map Development***

Daichi Kamiyama, Yuri Nishida, Rie Kamiyama, Anthony Sego, George Berner Vining, Kathy Clara Bui, Miyuki Fitch, Hy Gia Truong Do, Oshri Avraham, and Takahiro Chihara

**Extended Data Fig. 1:**

*Drosophila* GEF RNAi Screening Reveals Vav as the Primary GEF for aCC Dendritogenesis

**Extended Data Fig. 2:**

aProbe Enables Reliable Detection and Quantification for Cdc42 Activation in aCC Motoneurons

**Extended Data Fig. 3:**

Membrane-Localized Vav Rescues the Loss-of-Dendritic Phenotype in *Eph* Mutants

**Extended Data Fig. 4:**

Dendritic Filopodia Growth Appears Normal in *Ephrin* Mutants, and Global VNC Architecture Appears Normal in *Vap33* Mutants

**Extended Data Fig. 5:**

Vap33 Is Required for Dendritogenesis in Multiple Motoneurons

**Extended Data Fig. 6:**

Variable Expression Levels of Small GTPases in aCC Neurons and Proximal Localization of Eph Receptors

**Supplementary Table 1:**

List of Genotypes Shown in Figures

**Supplementary Table 2:**

List of Oligonucleotides and Gene Fragments Used in This Study

**
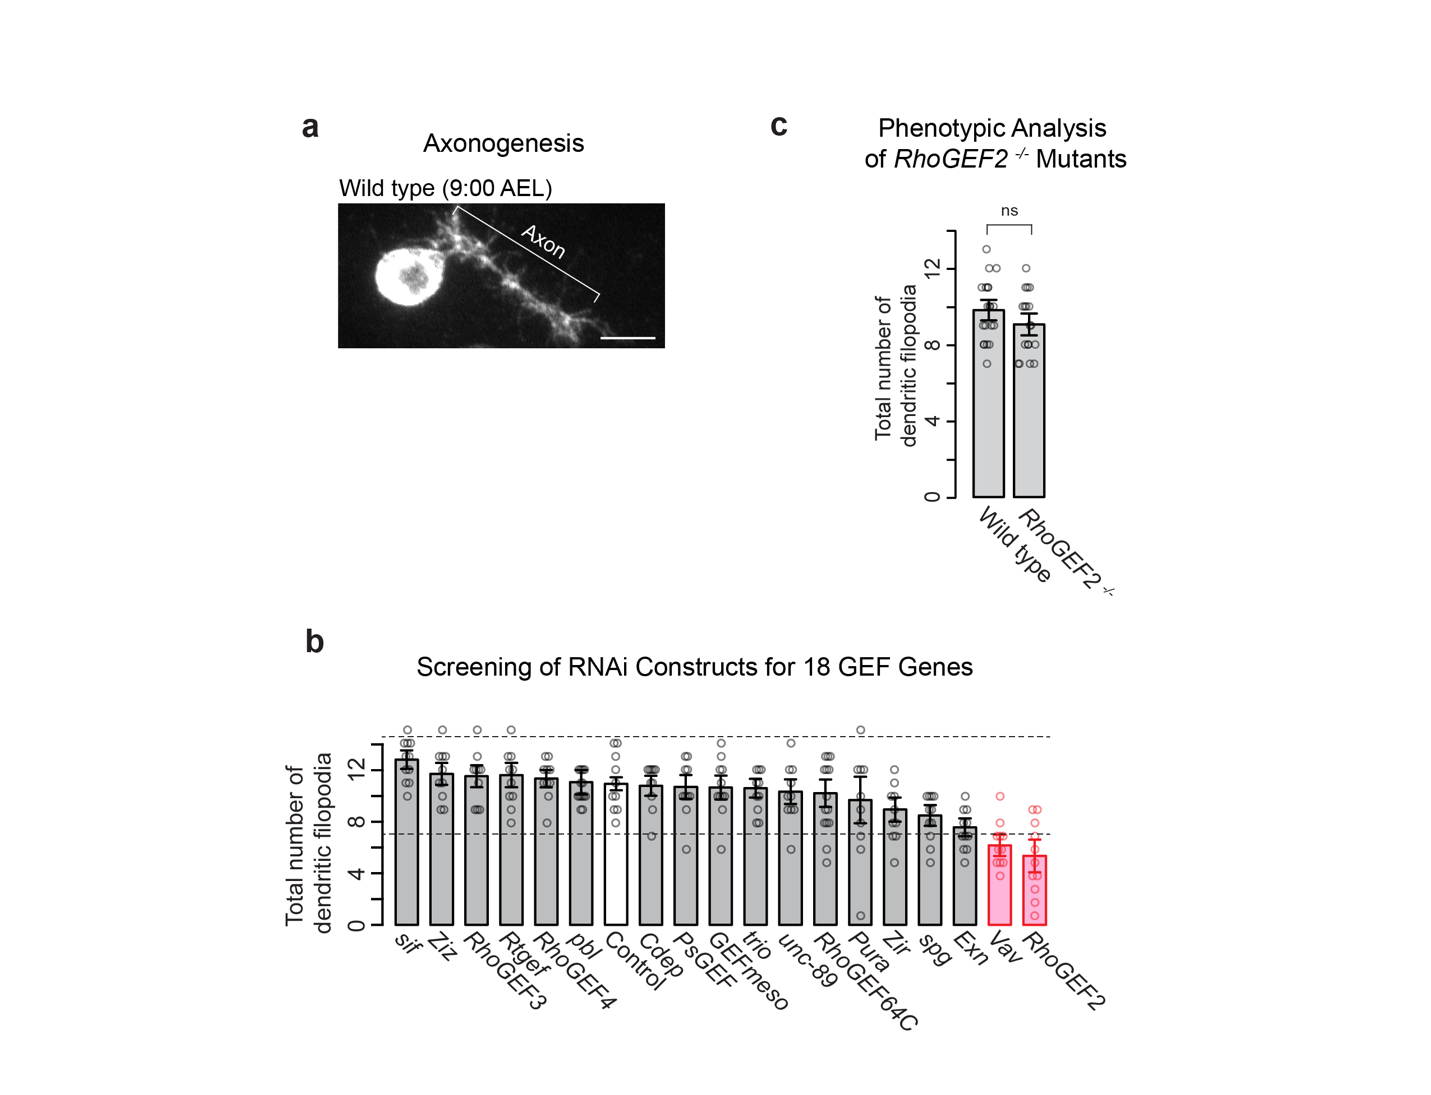
 Extended Data Fig. 1: *Drosophila GEF RNAi Screening Reveals Vav as the Primary GEF for aCC Dendritogenesis***

(**a**) Image of the aCC motoneuron expressing a GFP membrane marker driven by the *eve-GAL4* driver. At 9 hours after egg laying (AEL), aCC axons extend dorsally, initially displaying numerous filopodia, which reduce by 11:00 AEL (see **Fig. 1b**). (**b**) RNAi screening of genes encoding Cdc42 GEFs revealed dendritic filopodia counts in neurons expressing *UAS-RNAi* constructs under the *eve-GAL4* driver. *Vav* and *RhoGEF2* genes, considered outliers falling outside three standard deviations from the control (*eve-GAL4*) mean, are highlighted in red. Data are represented as mean ± SEM, with analyses involving 11–15 neurons per genotype at 15:00 AEL. (**c**) Quantification of dendritic branches in wild-type and *RhoGEF2* null embryos, analyzed using a two-sample *t*-test. The analysis included *n* = 18–20 neurons per genotype. Note that analyses of dendritic filopodia in all other figures are also shown at 15:00 AEL. Scale bar: 5 mm.

**
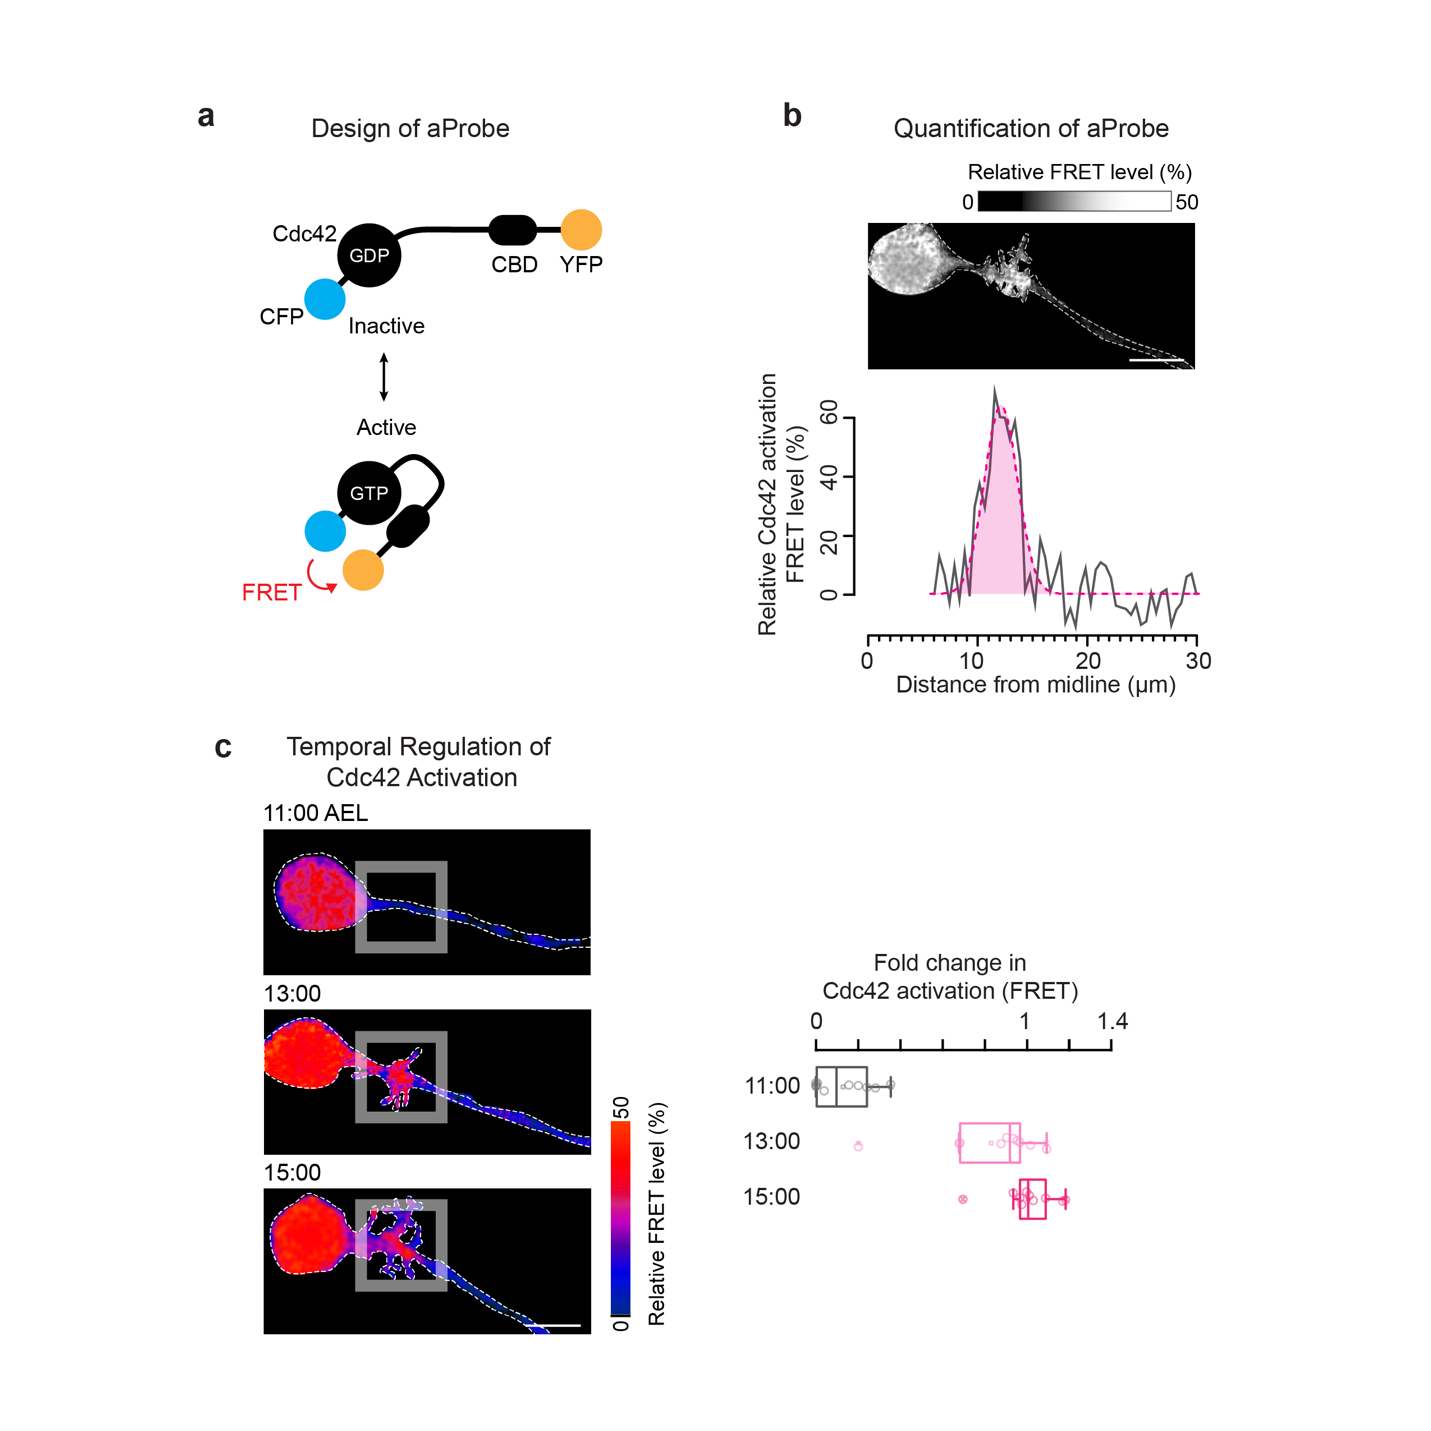
Extended Data Fig. 2: *aProbe Enables Reliable Detection and Quantification of Cdc42 Activation in aCC Motoneurons***

(**a**) Schematic of the aProbe construct featuring two fluorescent proteins, ECFP and Venus, at the N- and C-termini, respectively. The construct includes the Cdc42 binding domain (CBD) of Pak, Cdc42 itself, and a flexible linker connecting these components. (**b**) Quantification methodology for FRET signals is illustrated. Top: FRET values within a 3D neuronal volume are used to generate 2D density maps. Bottom: These values are further processed into a line plot for 1D analysis and fitted to a Gaussian equation to calculate the area under the peak, indicating the level of Cdc42 activation at dendritogenesis sites. (**c**) Left: Images of Cdc42 activation in aCC motoneurons using aProbe at 11:00, 13:00, and 15:00 AEL. Occasionally, faint signals are observed along the axons. Right: Quantification of Cdc42 activation across various developmental stages, presented as fold change in FRET levels. Each analysis includes data from 10 neurons per developmental stage. Scale bars: 5 mm.

**
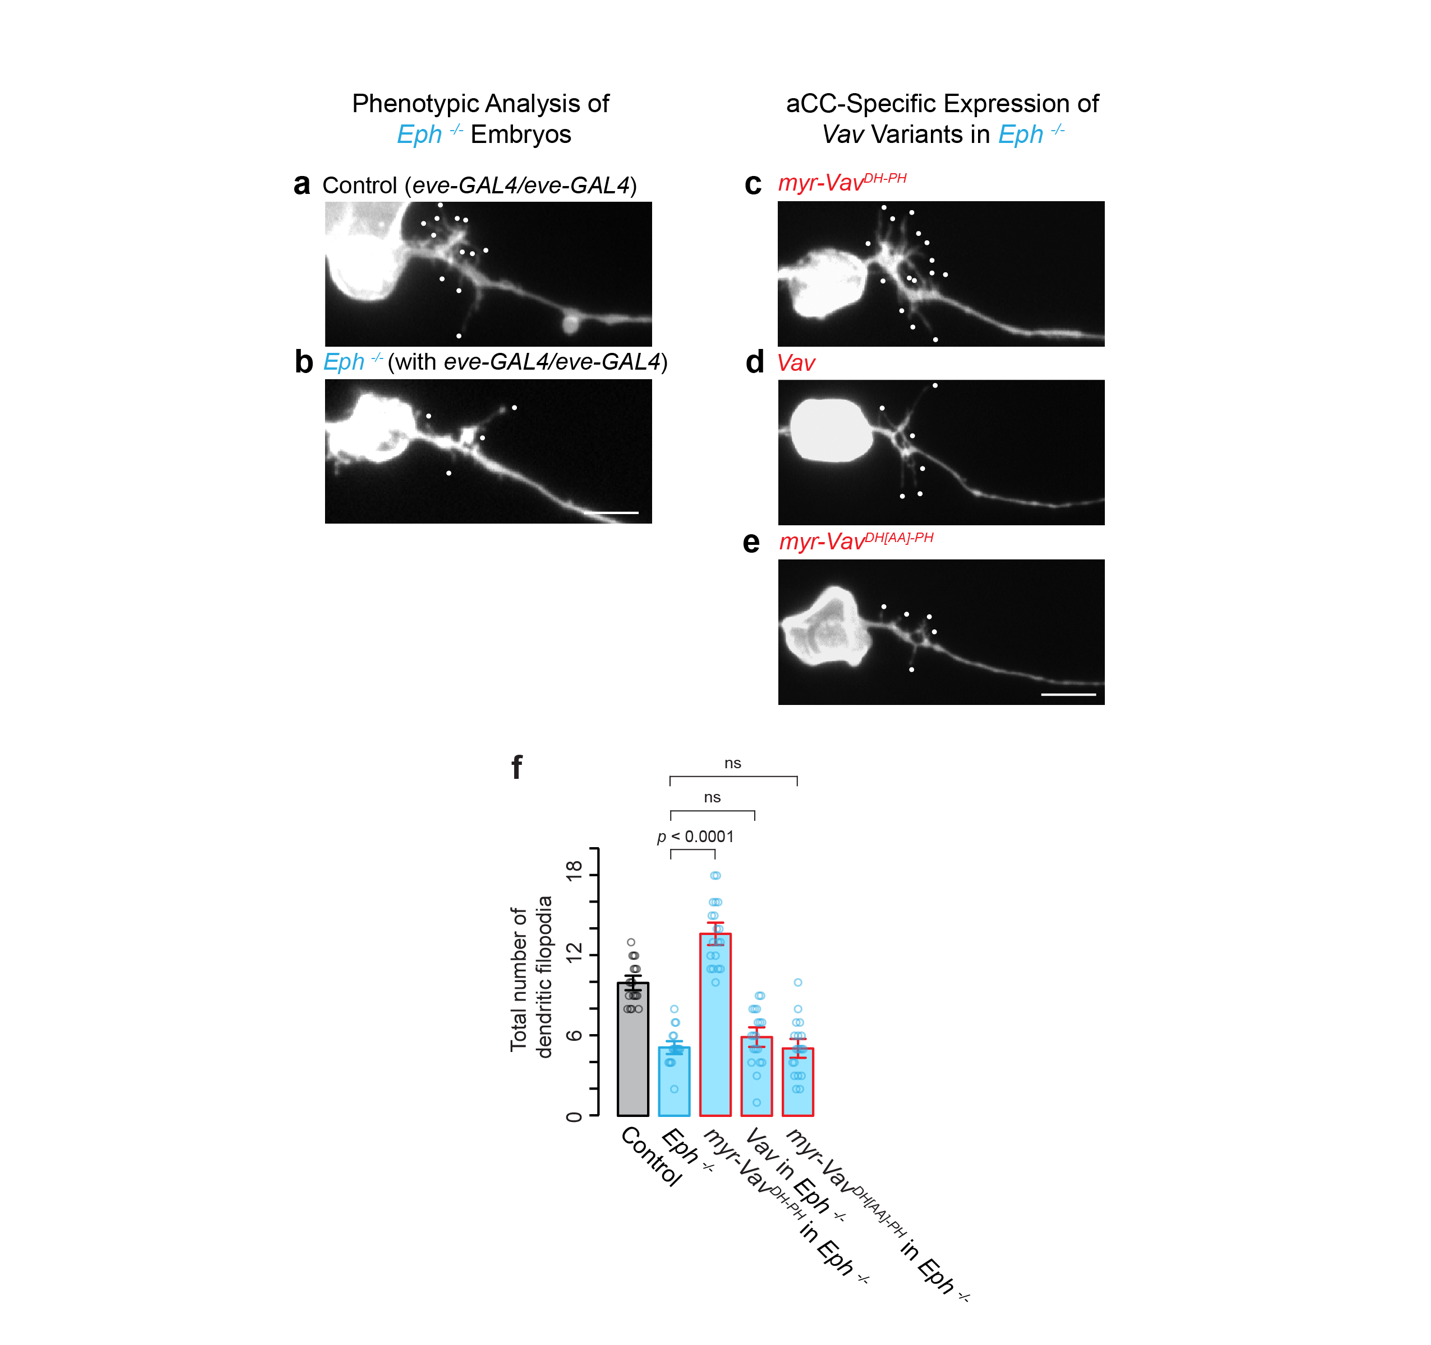
Extended Data Fig. 3: *Membrane-Localized Vav Rescues the Loss-of-Dendritic Phenotype in Eph Mutants***

(**a**-**e**) Representative images showcasing dendritic outgrowth in various experimental setups: control, *Eph -/-*, aCC-specific expression of *myr-VavDH-PH*, *Vav*, and *myr-VavDH[AA]-PH* in *Eph -/-* embryos. (**f**) Quantification of dendritic branches per aCC neuron for the indicated genotypes. Statistical significance was determined using one-way ANOVA (*F4,89* = 70, *p* = 0.0 x e0) with Tukey’s post hoc tests. The analysis included 19-20 neurons per genotype. Scale bars: 5 mm.


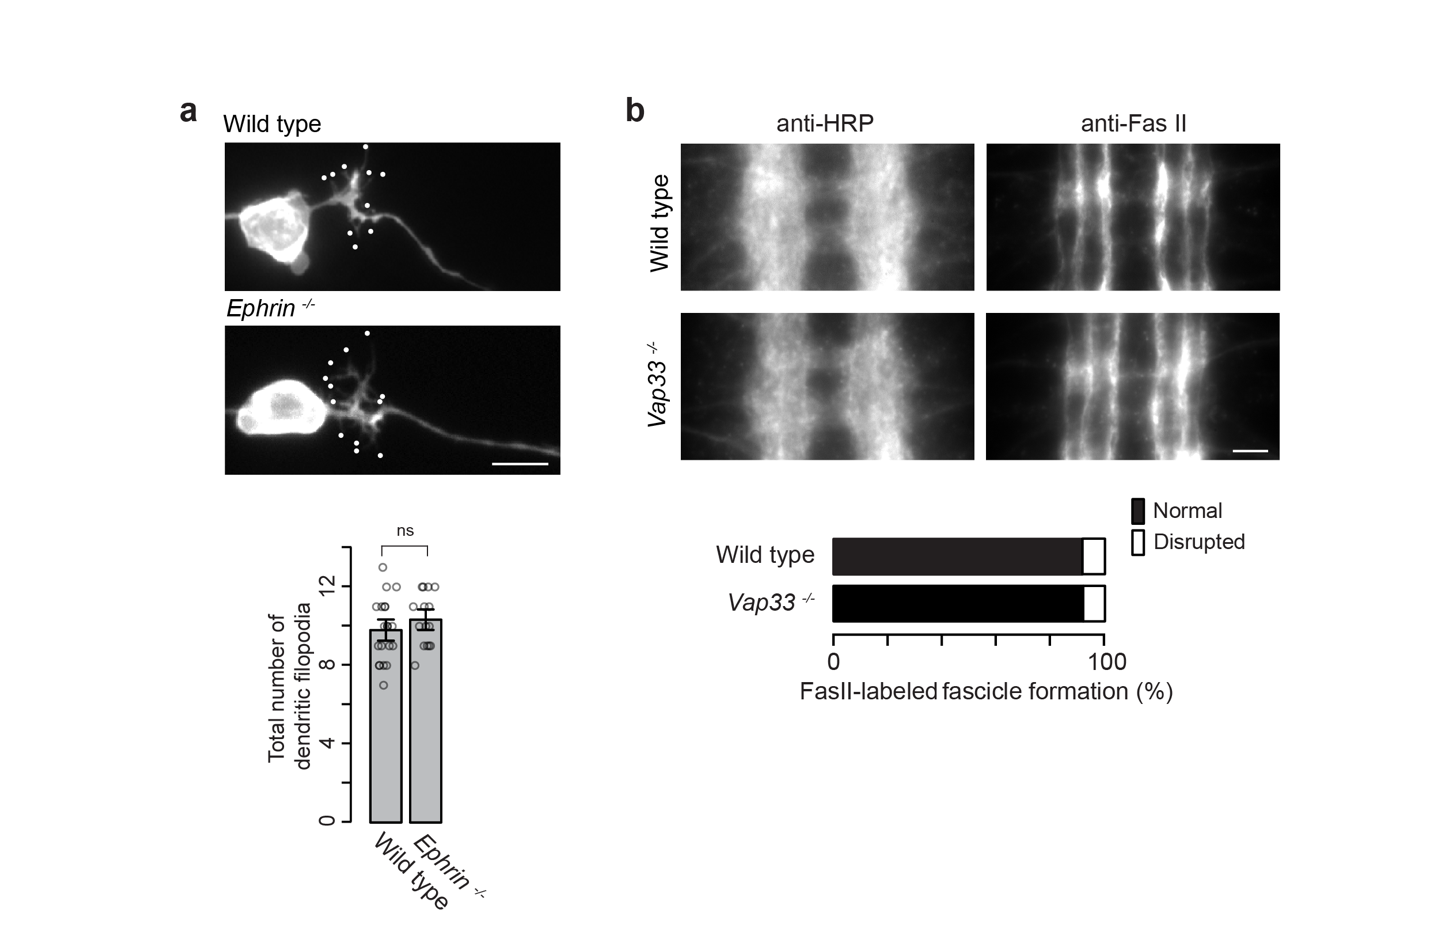
**Extended Data Fig. 4: *Dendritic Filopodia Growth Appears Normal in Ephrin Mutants, and Global VNC Architecture Appears Normal in Vap33 Mutants***

(**a**) Top: Representative images depicting dendritic outgrowth in wild-type and *ephrin -/-* embryos, showing no significant differences between the two. Bottom: Quantification of dendritic filopodia in the indicated genotypes. Statistical analysis was performed using a two-sample *t*-test (*n* = 15–20 neurons per genotype). (**b**) Top: The ventral nerve cord (VNC) of wild-type and *Vap33 -/-* embryos stained with anti-HRP or Fasciclin II (Fas II) at 15:00 AEL. Bottom: Quantification of axon growth and guidance defects in wild-type and *Vap33 -/-* embryos, revealing no prominent disruptions in the longitudinal tracts in the mutants (*n* = 25–39 segments per genotype). Scale bars: 5 mm in (a); 10 mm in (b).

**
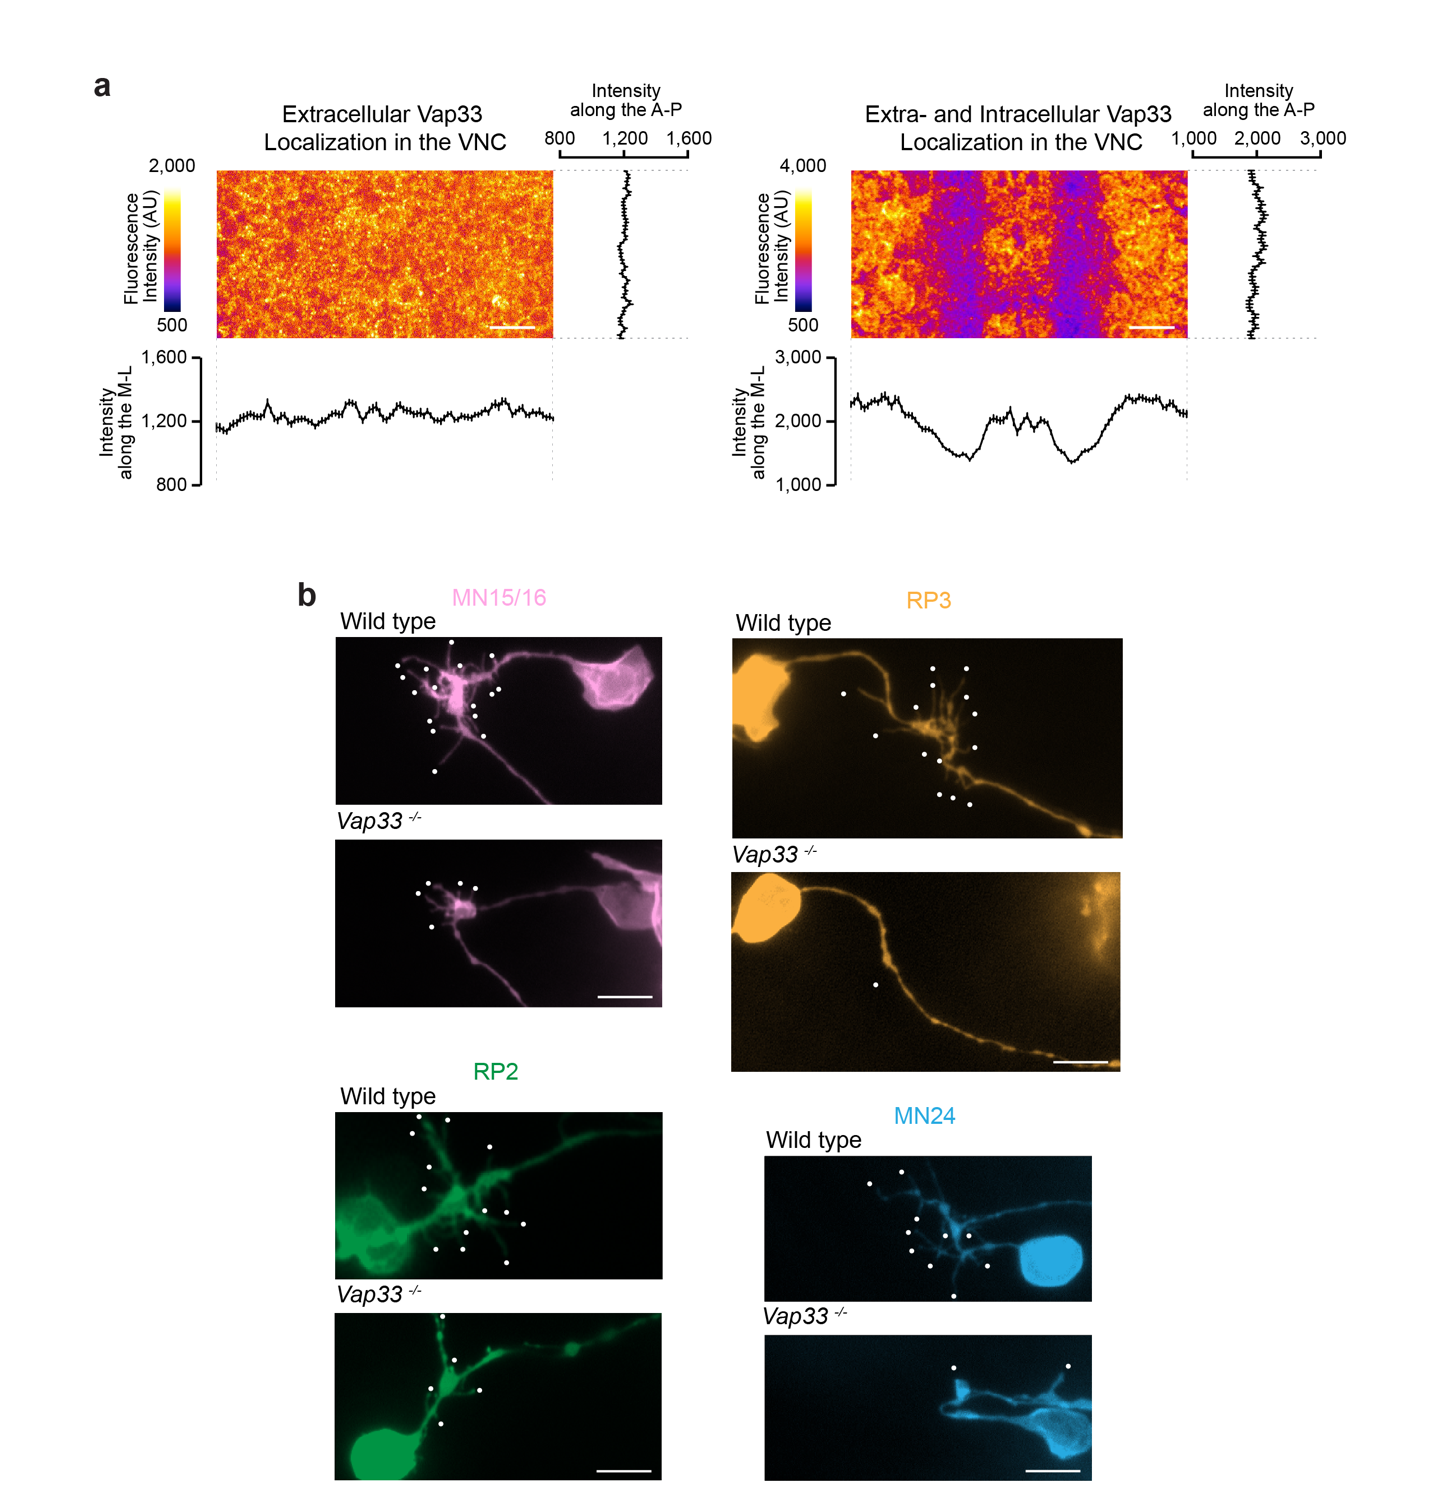
Extended Data Fig. 5: Vap33 Is Required for Dendritogenesis in Multiple Motoneurons**

(**A**) Left: A fluorescence image showing anti-Vap33 staining in a single segment of a wild-type embryo at 15:00 AEL, detecting the extracellular portion of Vap33 without detergent use. Right: A fluorescence image displaying anti-Vap33 staining at 11:00 AEL, detecting the full portion of Vap33 with detergent use. Line plots represent the intensity across the mediolateral (M-L) and anteroposterior (A-P) axes. (**B**) Representative images depicting dendritic outgrowth of four identifiable motoneurons in wild-type and *Vap33 -/-* embryos. The summarized quantification is presented in Figure 6B. Scale bars: 10 mm in (a); 5 mm in (b).

**
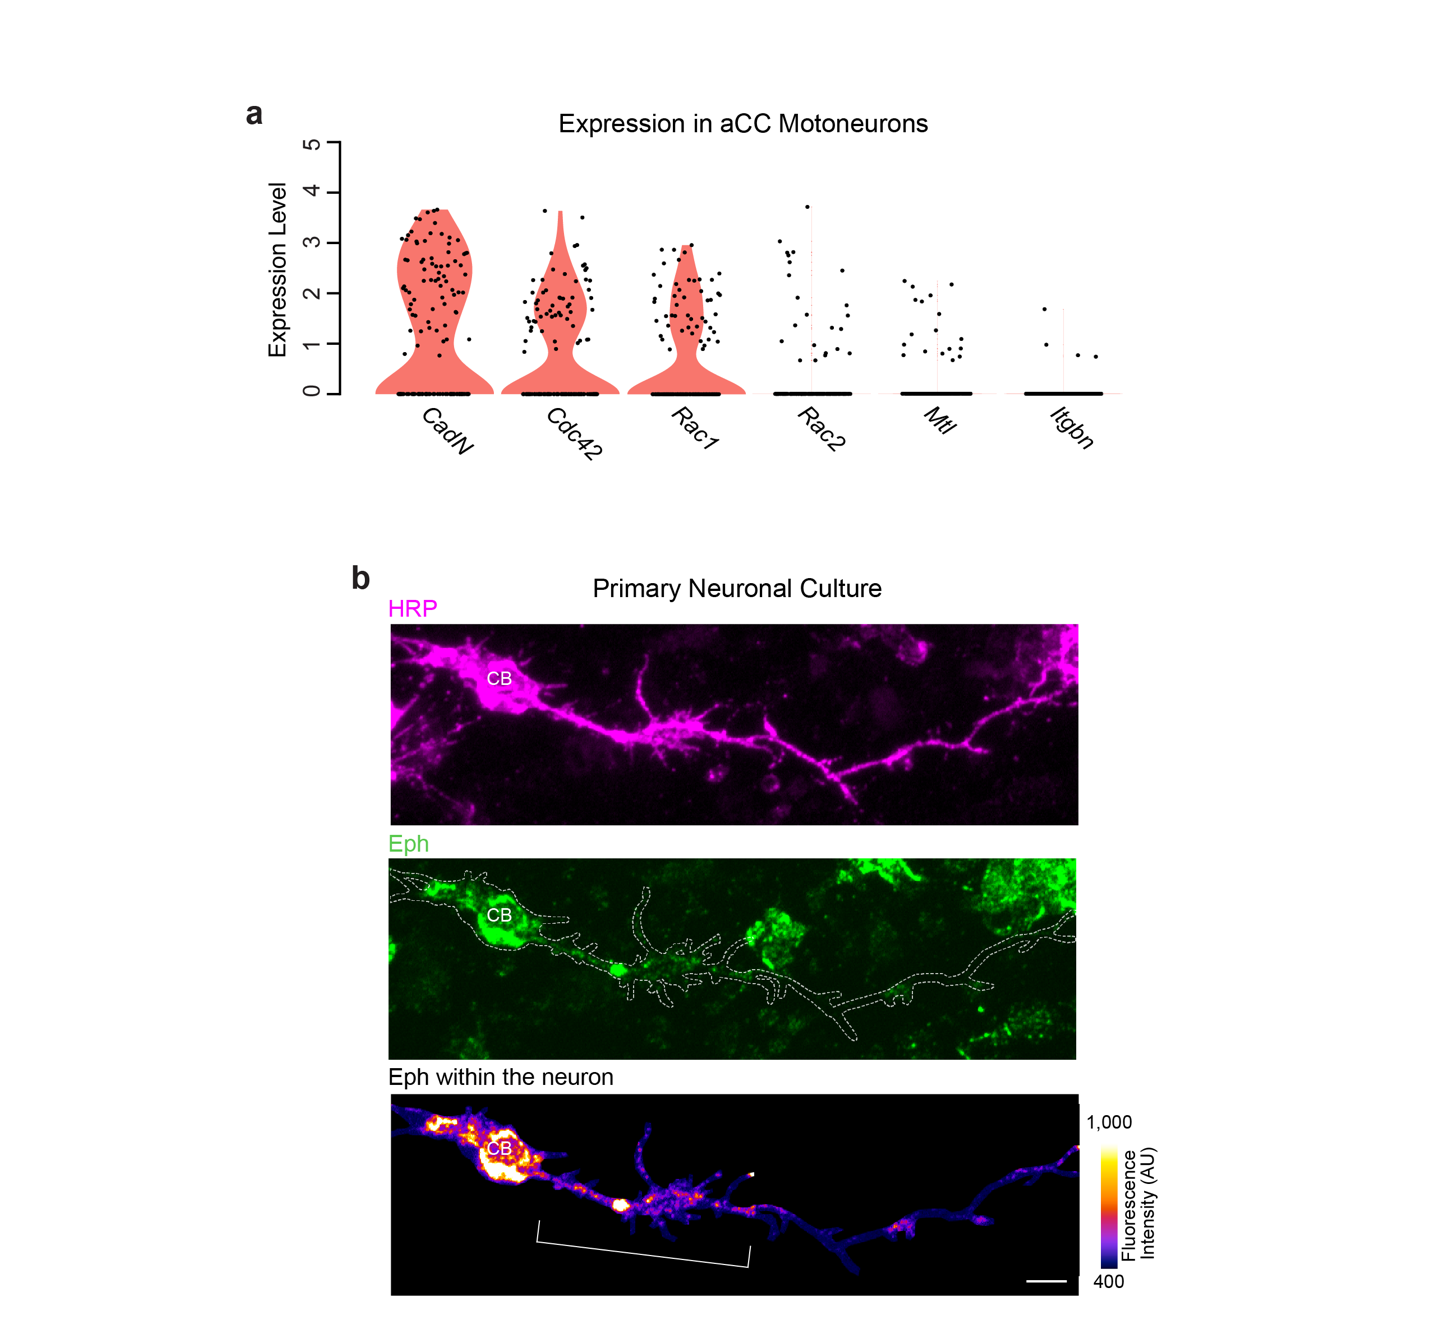
Extended Data Fig. 6: *Variable Expression Levels of Small GTPases in aCC Neurons and Proximal Localization of Eph Receptors***

(**a**) Violin plots showing gene expression levels specific to eve-positive neurons between 10:20 and 11:20 AEL. *CadN* and *Itgbn*, primarily expressed in the nervous system and musculature respectively, serve as positive and negative controls. The original single-cell RNA-seq data were obtained from Seroka et al. (**b**) Images of a primary cultured neuron 2 days after dissociation from embryos of *myc* knock-in lines of Eph. Top: Neuron immunostained with anti-HRP (a pan-neuronal membrane marker). Middle: The same neuron immunostained with anti-myc antibody. Dotted lines indicate the outline of the neuron based on the HRP image. Bottom: A pseudocolored image showing Eph distribution within the neuron. The bracket indicates the proximal region of the primary neurite, where Eph is highly localized. A similar localization pattern was observed in 10 randomly selected neurons (data not shown). Scale bar: 5 mm.

**
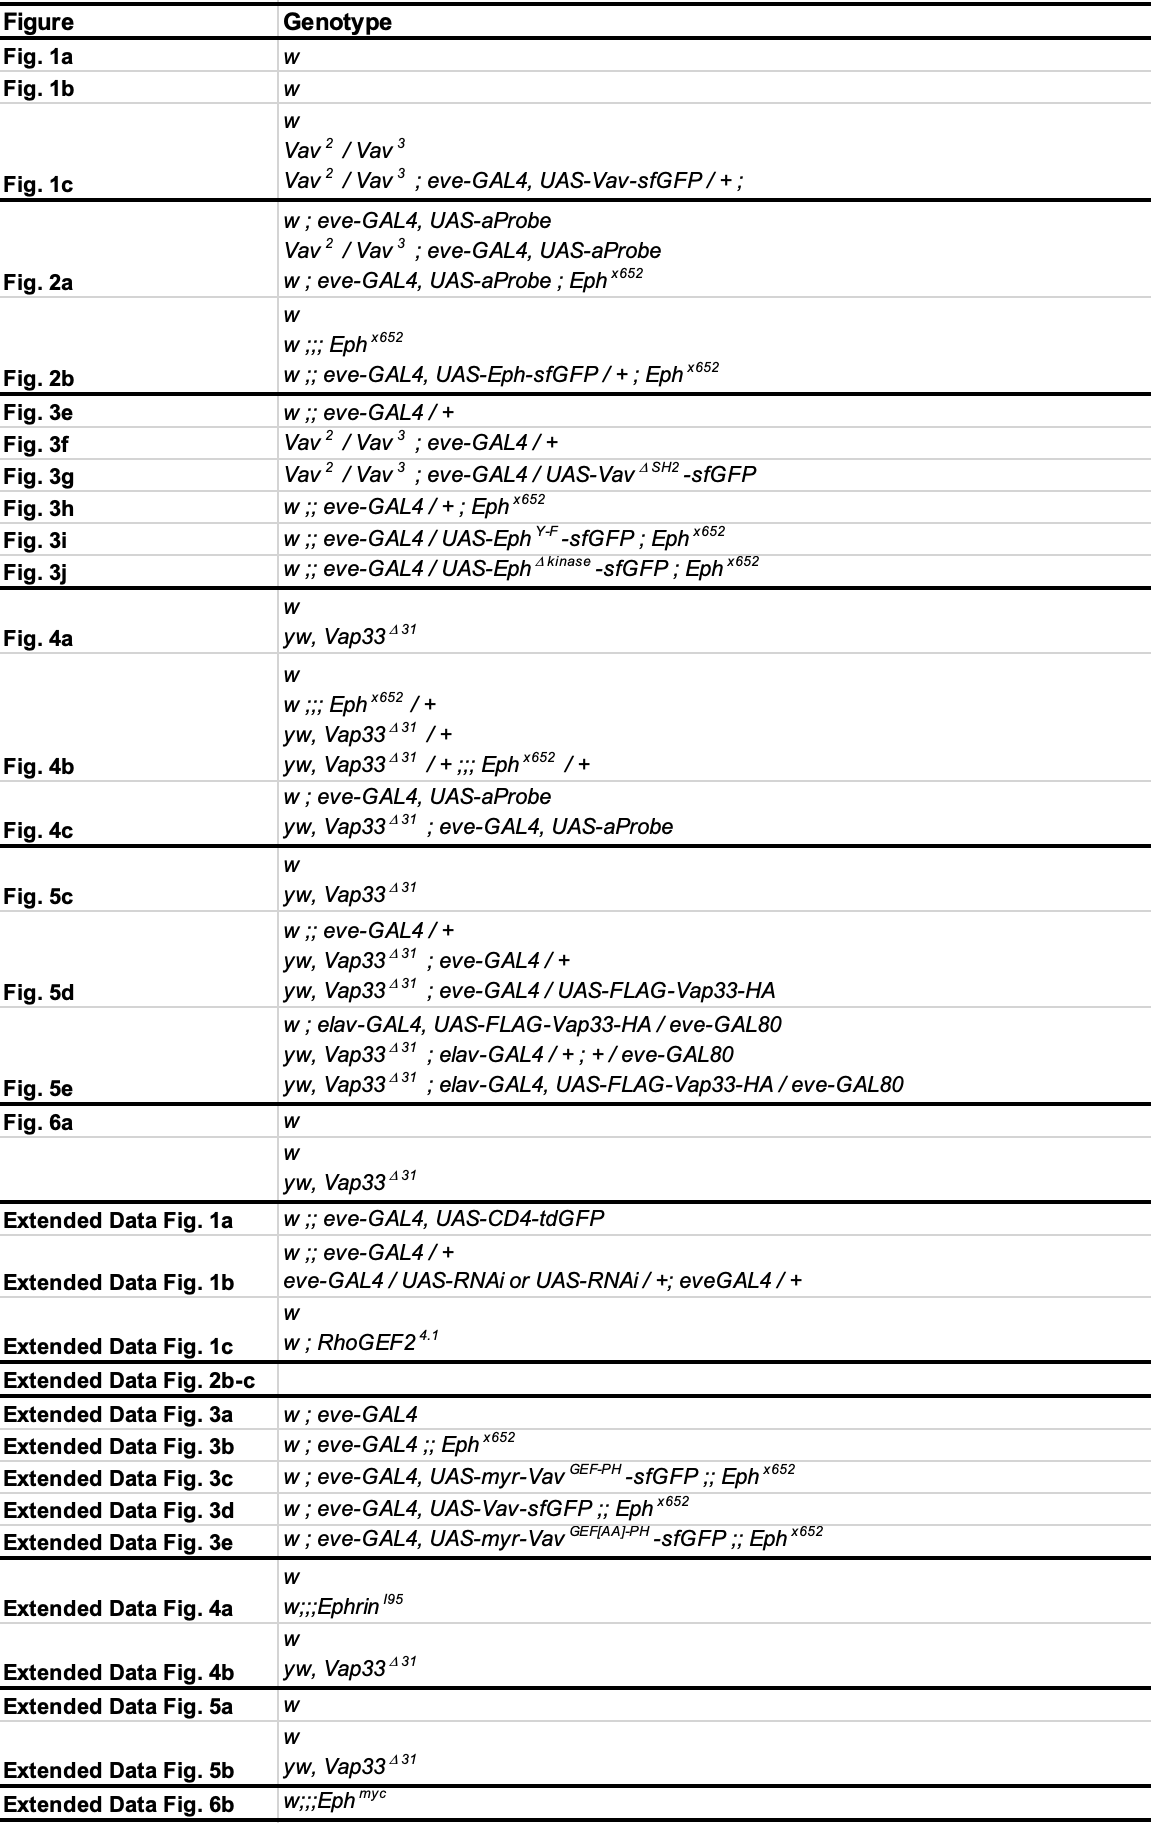
**

**Supplementary Table 1: List of Genotypes Shown in Figures**

| **Oligonucleotide or**  **gene fragment** | **Sequence (5’-3’)** |
| --- | --- |
| *Vav* (F) | TTAACAGATCTTGCGGCCGCATGGCCAGCAGCAGTAGCAGCAACAGTTTT |
| *Vav* (R) | CTTGCTCACCATGCGGCCGCCAAGCTCTTCGCTGGCCAATTTCTGCTCCT |
| *Eph* (F) | AATTCGTTAACAGATCTTGCGGCCGCATGACAAAAAGCGCCCTCAAGTCTG |
| *Eph* (R) | TCGCCCTTGCTCACCATGCGGCCGCCTATTATAGTGTCGAGTTGCCGGGC |
| *sfGFP* (F) | TTAACAGATCTTGCGGCCGCATGGTGAGCAAGGGCGAGGAGCTGTTCACC |
| *sfGFP* (R) | CTTCACAAAGATCCTCTAGATCACTCGAGCTTGTACAGCTCGTCCATGCC |
| *VavDSH2* (F) | GAACGCAACGATCTGGGC |
| *VavDSH2* (R) | ATTGAACTCGGACAACTGAC |
| *EphDkinase* (F) | GACAATTTGGCACGACAAC |
| *EphDkinase* (R) | GTAGTTTGCATCGATTTCTC |
| *EphY-F* [the 1st round] (F) | TTTATTTGGAAATAGCAGAAGCTTTGTAGATCCGCATACCTATG |
| *EphY-F* [the 1st round] (R) | GGCGTCGTCACTTCGTTGCTGGCAAAGTCAAGTGGTAATGGCAAATG |
| *EphY-F* [the 2nd round] (F) | ATTCGCTCGAGAAATCGATGCAAACTTTATTACAATAGAAGCTATTATCG |
| *EphY-F* [the 2nd round] (R) | TCCCTTATAGCTTGATTAGGATCTTCGAAGGTATGCGGATCTACAAAG |
| *myr-VavGEF-PH* | GAATTCAGATCTATGGGCAACAAATGCTGCAGCAAGCGACAGGATCAGGAACTGGCACTGGCCTATCCCACTGGGGGCTACAAGAAATCCGACTACACCTTTGGCCAGACGCACATCAACAGCAGCGGCGGCGGCAACATGGGCGGCGTTCTTGGCCAGAAGCATAACAACGGTGGCTCGCTGGACTCGCGCTACACGCCCGATCCCAATCATCGGGGTCCGTTGAAAATCGGCGGAAAGGGCGGCGTTGACATCATCAGACCACGCGGATCCGTCATCCGCGAGCTGATCGACACGGAGTCCAATTACCTGGACGTTCTCACTGCGCTGAAGACCAAGTTTATGGGTCCGCTGGAGCGGCATCTCAACCAGGACGAGCTGCGTCTCATATTCCCGCGCATCAGAGAGCTGGTCGACATCCATACAAAGTTCCTGGACAAACTAAGGGAATCGCTGACGCCCAATGCCAAAGTGAAGATGGCCCAGGTGTTTCTCGACTTCCGCGAACCCTTCCTCATCTACGGCGAGTTCTGCTCCCTCCTGCTGGGCGCCATTGACT |

(*Table continues*)

|  | ATTTGGCGGATGTGTGCAAGAAGAACCAGATCATCGATCAGCTGGTGCAGAAGTGCGAGCGGGACTACAATGTGGGCAAACTGCAGCTACGTGACATACTCTCAGTGCCCATGCAGCGCATTCTCAAGTACCATCTGCTGCTGGACAAGCTGGTGAAGGAGACATCGCCGCTGCACGACGATTACCGCTCGCTGGAGCGGGCCAAGGAGGCGATGATAGACGTGTCGCAATATATCAACGAGGTGAAACGCGACTCCGATCACCTGGTCATCATACAGAAGGTGAAGGACAGCATCTGCGATATTCATCTGCTGCAGAATGGCAACGGCAGCGATCTGCTGCAGTACGGCCGCCTGCTTCTCGACGGTGAGCTGCACATTAAGGCGCACGAGGACCAGAAGACCAAGCTGCGATACGCCTTCGTTTTCGACAAGATCCTCATCATGGTGAAGGCGCTGCATATCAAGACGGGCGACATGCAGTACACCTACCGCGACTCCCACAACCTGGCCGACTATCGCGTGGAGCAGAGCCATTCGCGACGCACTATTGGCCGCGATACGCGATTCAAGTACCAGCTCCTCCTGGCCCGCAAGTCGGGCAAGACAGCCTTCACTTTGTACCTGAAATCGGAGCACGAGCGGGACAAGTGGCGCAAGGCGCTCACCGAGGCCATGGAATAAGCGGCCGC |
| --- | --- |
| *myr-VavGEF[AA]-PH* | GAATTCAGATCTATGGTCATCCGCGAGCTGATCGACACGGAGTCCAATTACCTGGACGTTCTCACTGCGCTGAAGACCAAGTTTATGGGTCCGCTGGAGCGGCATCTCAACCAGGACGAGCTGCGTCTCATATTCCCGCGCATCAGAGAGCTGGTCGACATCCATACAAAGTTCCTGGACAAACTAAGGGAATCGCTGACGCCCAATGCCAAAGTGAAGATGGCCCAGGTGTTTCTCGACTTCCGCGAACCCTTCCTCATCTACGGCGAGTTCTGCTCCCTCCTGCTGGGCGCCATTGACTATTTGGCGGATGTGTGCAAGAAGAACCAGATCATCGATCAGCTGGTGCAGAAGTGCGAGCGGGACTACAATGTGGGCAAACTGCAGCTACGTGACATACTCTCAGTGCCCATGCAGCGCATTGCCGCGTACCATCTGCTGCTGGACAAGCTGGTGAAGGAGACATCGCCGCTGCACGACGATTACCGCTCGCTGGAGCGGGCCAAGGAGGCGATGATAGACGTGTCGCAATATATCAACGAGGTGAAACGCGACTCCGATCACCTGGTCATCATACAGAAGGTGAAGGACAGCATCTGCGATATTCATCTGCTGCAGAATGGCAACGGCAGCGATCTGCTGCAGTACGGCCGCCTGCTTCTCGACGGTGAGCTGCACATTAAGGCGCACGAGGACCAGAAGACCAAGCTGCGATACGCCTTCGTTTTCGACAAGATCCTCATCATGGTGAAGGCGCTGCATATCAAGACGGGCGACATGCAGTACACCTACCGCGACTCCCACAACCTGGCCGACTATCGCGTGGAGCAGAGCCATTCGCGACGCACTATTGGCCGCGATACGCGATT |

(*Table continues*)

|  | CAAGTACCAGCTCCTCCTGGCCCGCAAGTCGGGCAAGACAGCCTTCACTTTGTACCTGAAATCGGAGCACGAGCGGGACAAGTGGCGCAAGGCGCTCACCGAGGCCATGGAATAAGCGGCCGC |
| --- | --- |
| *Vav-3xFLAG* (F) | TTAACAGATCTTGCGGCCGCATGGCCAGCAGCAGTAGCAGCAACAGTTTT |
| *Vav-3xFLAG* (R) | CAAAGATCCTCTAGATCACTTGTCATCGTCATCCTTGTAATCGATGTCATGATCTTTATAATCACCGTCATGGTCTTTGTAGTCCTGCTCCTGCACATA |
| *Eph-IC* (F) | AATTCGTTAACAGATCTGCGGCCGCATGAGATCGAAGCATCAGGATGATC |
| *Eph-IC* (R) | TTCACAAAGATCCTCTAGAGGTACCTCATTTACCCGGAGACAGGGAGAGG |

(F), forward; (R), reverse

**Supplementary Table 2: List of Oligonucleotides and Gene Fragments Used in This Study**
